# Supplementary material
Source: Springer Nature journal article supplement (https://www.springermedizin.de/resource/supplementary/12974_2007_107_MOESM4_ESM.pdf/9600786)

### A. Plasma levels

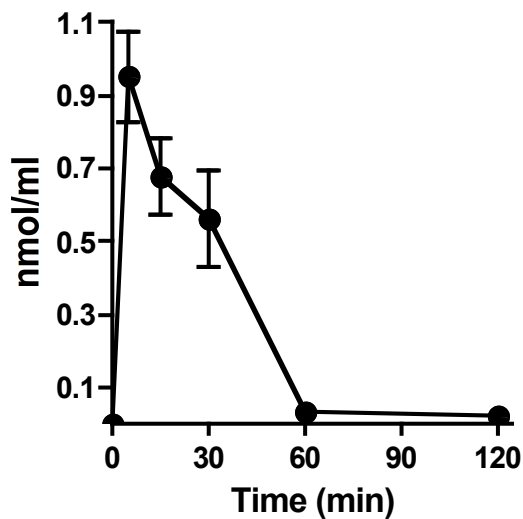

### B. Brain levels

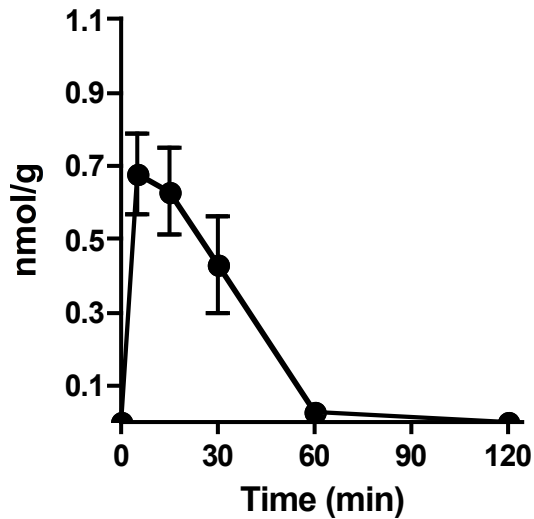

### C. No liver toxicity

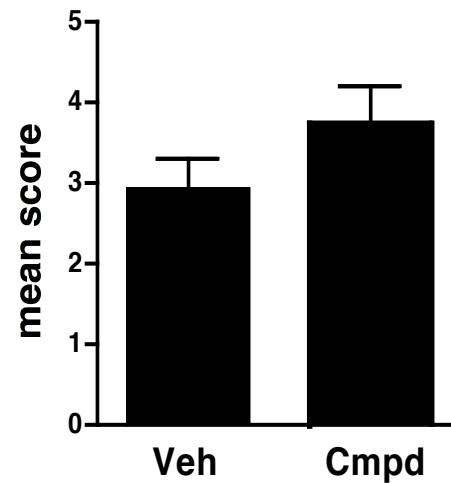

### D. Stability in human liver microsomes *in vitro*

#### MW01-2-069A-SRM

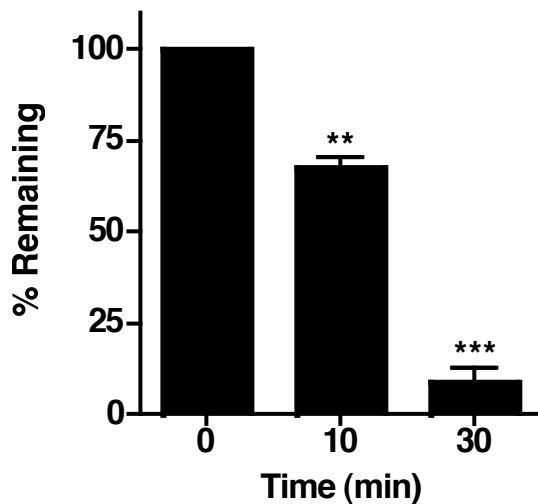

#### Minaprine

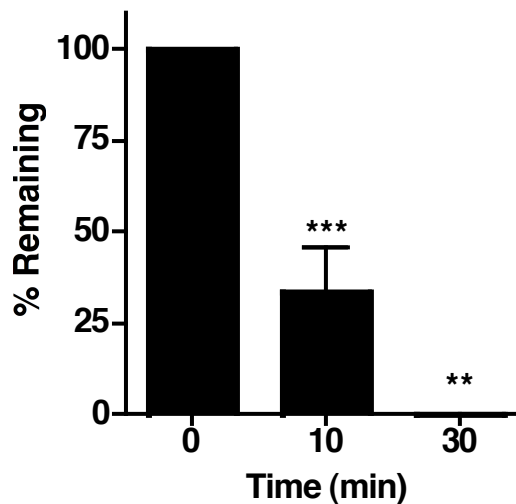

#### Minozac

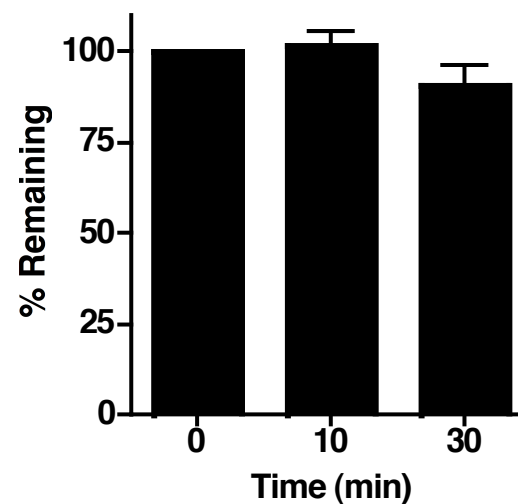

Supplement: MOESM4 [file 9600786]
